# Supplementary material for: Cotranslational interaction of human EBP50 and ezrin overcomes masked binding site during complex assembly
Source: PubMed Central journal article supplement — Proc Natl Acad Sci U S A. 2022 Feb 9;119(7):e2115799119. doi: 10.1073/pnas.2115799119 (PMC8851480; doi:10.1073/pnas.2115799119), 2022-02-09
Supplement: pnas.2115799119.sapp.pdf [file pnas.2115799119.sapp.pdf]

## **Supplementary Information for**

### **Co-translational interaction of human EBP50 and ezrin overcomes masked binding site during complex assembly**

Krishnendu Khan<sup>a</sup>, Briana Long<sup>a</sup>, Camelia Baleanu Gogonea<sup>b</sup>, Valentin Gogonea<sup>b</sup>, Gauravi M. Deshpande<sup>c</sup>, Kommireddy Vasu<sup>a</sup>, Paul L. Fox<sup>a,b,1</sup>

<sup>a</sup>Department of Cardiovascular and Metabolic Sciences, Lerner Research Institute, Cleveland Clinic, Cleveland, OH 44195, USA; <sup>b</sup>Department of Chemistry, Cleveland State University, Cleveland, OH 44115, USA; <sup>c</sup>Imaging Core, Lerner Research Institute, Cleveland Clinic, Cleveland, OH 44195, USA

<sup>1</sup>Paul L. Fox  
Email: [foxp@ccf.org](mailto:foxp@ccf.org)

#### **This PDF file includes:**

Figure S1

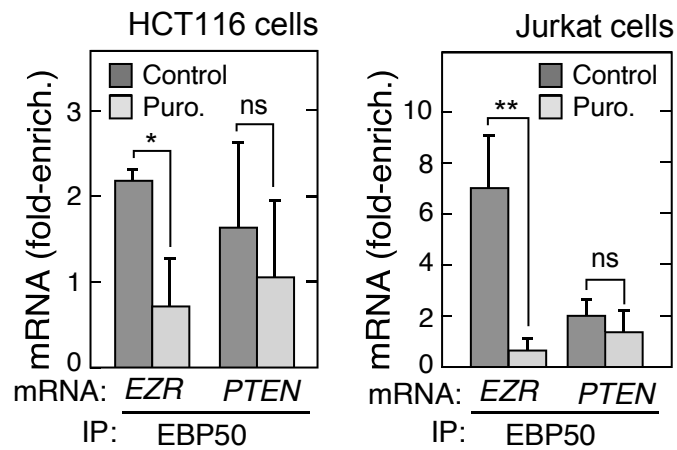

**Fig. S1.** Co-translational interaction of EBP50 and ezrin in multiple cell types, HCT116 (left) and Jurkat (right) cells were subjected to anti-EBP50 RIP-qRT-PCR with probes for *EZR* and *PTEN* mRNAs. The experiments were done in the absence and presence of puromycin, and shown as fold-enrichment compared to isotype-specific IgG RIP-qRT-PCR. Mean + sd, n = 3; \*p < 0.05, \*\*p < 0.01, ns = not significant.
